# Supplementary material for: Impact of Age and Heart Rate on Strain-Derived Myocardial Work in a Population of Healthy Subjects
Source: MDPI journal article supplement (doi:10.3390/diagnostics12071697), 2022-07-12
Supplement: s1 [file s1]

**Table S1.** Univariable analysis for Myocardial work parameters

| <i>Dependent variable</i> | <i>Covariate</i>           | <i>B coefficient</i> | <i>p</i> |
|---------------------------|----------------------------|----------------------|----------|
| GWI (mmHg %)              | <i>Age (years)</i>         | 0.121                | 0.11     |
|                           | <i>Systolic BP (mmHg)</i>  | 0.65                 | <0.0001  |
|                           | <i>Diastolic BP (mmHg)</i> | 0.33                 | <0.0001  |
|                           | <i>HR (bpm)</i>            | -0.03                | 0.70     |
|                           | <i>EF (%)</i>              | 0.10                 | 0.17     |
|                           | <i>E/e' ratio</i>          | 0.22                 | 0.004    |
|                           | <i>LAVi (ml/m2)</i>        | 0.22                 | 0.003    |
| GCW (mmHg %)              | <i>Age (years)</i>         | 0.19                 | 0.009    |
|                           | <i>Systolic BP (mmHg)</i>  | 0.71                 | <0.0001  |
|                           | <i>Diastolic BP (mmHg)</i> | 0.33                 | <0.0001  |
|                           | <i>HR (bpm)</i>            | -0.03                | 0.70     |
|                           | <i>EF (%)</i>              | 0.13                 | 0.08     |
|                           | <i>E/e' ratio</i>          | 0.21                 | 0.005    |
|                           | <i>LAVi (ml/m2)</i>        | 0.21                 | 0.005    |
| GWW (mmHg %)              | <i>Age (years)</i>         | 0.02                 | 0.74     |
|                           | <i>Systolic BP (mmHg)</i>  | 0.14                 | 0.06     |
|                           | <i>Diastolic BP (mmHg)</i> | 0.37                 | 0.63     |
|                           | <i>HR (bpm)</i>            | 0.19                 | 0.01     |
|                           | <i>EF (%)</i>              | 0.11                 | 0.16     |
|                           | <i>E/e' ratio</i>          | 0.03                 | 0.72     |
|                           | <i>LAVi (ml/m2)</i>        | 0.03                 | 0.69     |
| GWE (%)                   | <i>Age (years)</i>         | -0.007               | 0.93     |
|                           | <i>Systolic BP (mmHg)</i>  | 0.05                 | 0.55     |
|                           | <i>Diastolic BP (mmHg)</i> | 0.03                 | 0.72     |
|                           | <i>HR (bpm)</i>            | -0.16                | 0.03     |
|                           | <i>EF (%)</i>              | -0.08                | 0.26     |
|                           | <i>E/e' ratio</i>          | -0.04                | 0.611    |
|                           | <i>LAVi (ml/m2)</i>        | 0.13                 | 0.08     |

**Table S2.** Demographic and echocardiographic parameters distribution according age tertiles

| <i>Analysis according to age tertiles</i> |                                                           |                                                               |                                                        |                     |
|-------------------------------------------|-----------------------------------------------------------|---------------------------------------------------------------|--------------------------------------------------------|---------------------|
| <i>Parameter</i>                          | <i>1<sup>st</sup> Tertile<br/>(&lt;32 years)<br/>n=54</i> | <i>2<sup>d</sup> Tertile<br/>(32 - &lt;49 years)<br/>n=61</i> | <i>3<sup>rd</sup> Tertile<br/>(≥49 years)<br/>n=62</i> | <i>Cumulative p</i> |
| <i>BMI (Kg/m<sup>2</sup>)</i>             | 21.8±2.5                                                  | 23.9±2.6*                                                     | 24.4±2.4*                                              | <0.0001             |
| <i>Systolic BP (mmHg)</i>                 | 115.2±13.1                                                | 122.4±10.8**                                                  | 123.4±12.4 <sup>±</sup>                                | <0.001              |
| <i>Diastolic BP (mmHg)</i>                | 74.3±7.4                                                  | 74.8±8.1                                                      | 75.9±7.9                                               | 0.50                |
| <i>Heart rate (bpm)</i>                   | 72.4±11.4                                                 | 70.8±9.1                                                      | 68.9±10.5                                              | 0.198               |
| <i>LV mass index (g/m<sup>2</sup>)</i>    | 26.3±4.7                                                  | 30.6±7.5                                                      | 33.3±8.1                                               | <0.0001             |
| <i>RDWT</i>                               | 0.31±0.05                                                 | 0.33±0.05                                                     | 0.33±0.06                                              | 0.09                |
| <i>LV EF</i>                              | 63.5±5.08                                                 | 63.8±5.1                                                      | 63.5±3.8                                               | 0.95                |
| <i>E/A ratio</i>                          | 1.64±0.36                                                 | 1.40±0.29                                                     | 0.98±0.27                                              | <0.0001             |
| <i>E/e' ratio</i>                         | 5.68±0.98                                                 | 6.32±1.24                                                     | 7.92±2.19                                              | <0.0001             |
| <i>LAVi (ml/m<sup>2</sup>)</i>            | 24.3±4.9                                                  | 24.6±5.5                                                      | 25.1±6.2                                               | 0.744               |
| <i>GLS (%)</i>                            | 23.4 ± 1.7                                                | 22.5±1.6                                                      | 22.6±1.6                                               | 0.01                |

\*p<0.0001 vs 1st tertile; \*\* p<0.005 vs 1st tertile, <sup>±</sup>p<0.001 vs 1st tertile
